# Supplementary material for: Beyond the Scavenging of Reactive Oxygen Species (ROS): Direct Effect of Cerium Oxide Nanoparticles in Reducing Fatty Acids Content in an In Vitro Model of Hepatocellular Steatosis
Source: PubMed Central journal article supplement (PMC6770635; doi:10.3390/biom9090425), 2019-08-29
Supplement: biomolecules-09-00425-s001.pdf [file biomolecules-09-00425-s001.pdf]

**Figure S1.** Cell viability (a) and intracellular reactive oxygen species (ROS) production (b) of HepG2 cells incubated with medium (control), H<sub>2</sub>O<sub>2</sub> (1.5 mM) and H<sub>2</sub>O<sub>2</sub> and CeO<sub>2</sub>NPs (1.5 mM; 10 µg/mL). \*p < 0.05 vs control and #p < 0.05 vs H<sub>2</sub>O<sub>2</sub>. **Figure S2:** Content of saturated (a), monounsaturated (b) and polyunsaturated (c) fatty acids in HepG2 cells exposed to vehicle (control), OA:PA (1.33:0.67 mM) and OA:PA with CeO<sub>2</sub>NPs (10 µg/mL). **Table S1:** Fatty acids content in HepG2 cells exposed to vehicle (control), OA:PA (1.33:0.67 mM) and OA:PA with CeO<sub>2</sub>NPs (10 µg/mL).

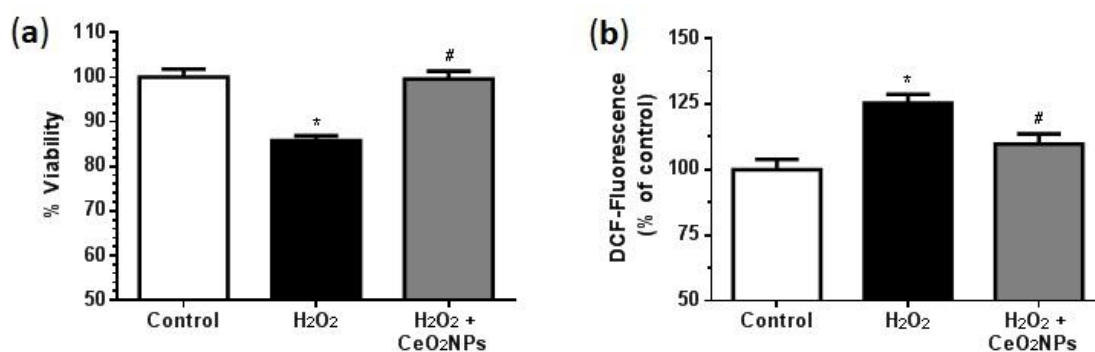

**Figure S1.** Cell viability (a) and intracellular ROS production (b) of HepG2 cells incubated with medium (control), H<sub>2</sub>O<sub>2</sub> (1.5 mM) and H<sub>2</sub>O<sub>2</sub> and CeO<sub>2</sub>NPs (1.5 mM; 10 µg/mL). \*p < 0.05 vs control and #p < 0.05 vs H<sub>2</sub>O<sub>2</sub>.

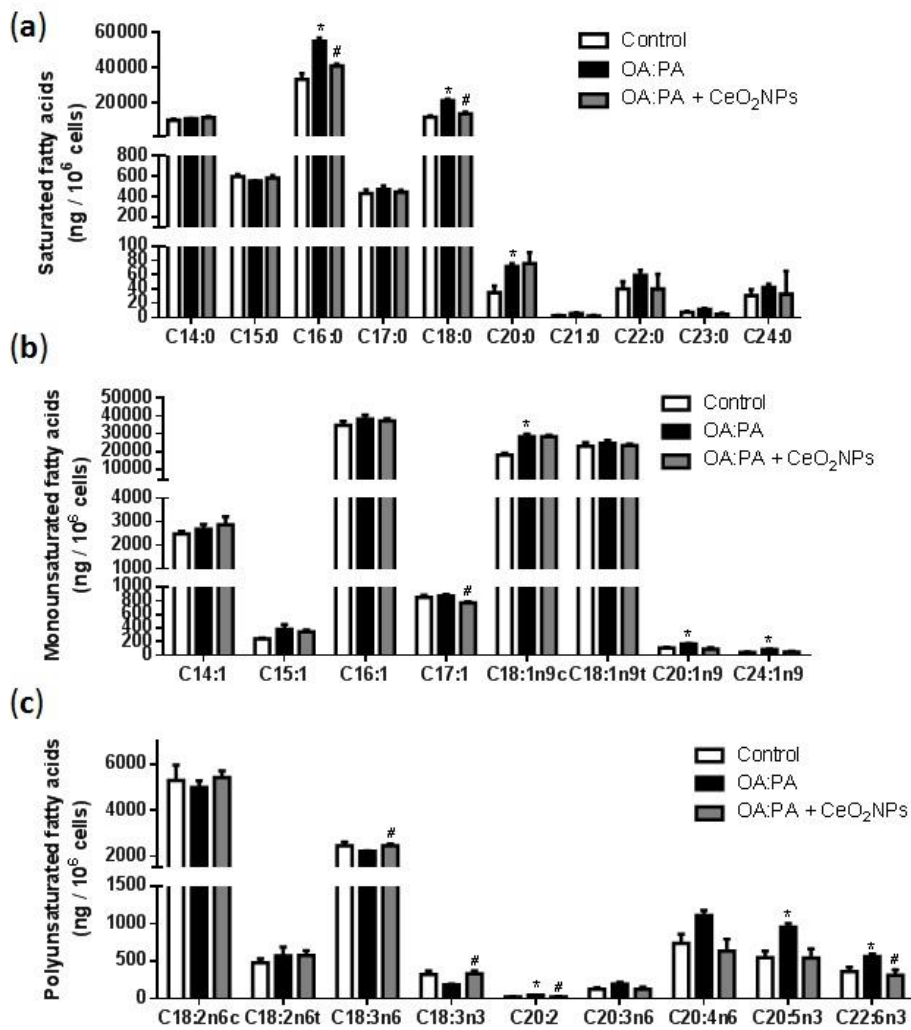

**Figure S2.** Content of saturated (a), monounsaturated (b) and polyunsaturated (c) fatty acids in HepG2 cells exposed to vehicle (control), OA:PA (1.33:0.67 mM) and OA:PA with CeO<sub>2</sub>NPs (10 µg/mL). \*p < 0.05 compared with control; #p < 0.05 compared with OA:PA.

**Table S1.** Fatty acids content in HepG2 cells exposed to vehicle (control), OA:PA (1.33:0.67 mM) and OA:PA with CeO<sub>2</sub>NPs (10 µg/mL).

| Fatty acids<br>(ng / 10 <sup>6</sup> cells) | Control        | OA:PA           | OA:PA+ CeO <sub>2</sub> NPs |
|---------------------------------------------|----------------|-----------------|-----------------------------|
| C12:0                                       | 120.0 ± 62.10  | 210.1 ± 14.52   | 291.8 ± 104.7               |
| C14:0                                       | 10168 ± 661.7  | 11075 ± 102.1   | 11769 ± 376.6               |
| C14:1                                       | 2490 ± 103.9   | 2673 ± 221.5    | 2864 ± 350.7                |
| C15:0                                       | 594.8 ± 21.84  | 552.1 ± 4.895   | 580.6 ± 25.00               |
| C15:1                                       | 242.5 ± 7.916  | 380.2 ± 72.78   | 345.6 ± 28.20               |
| C16:0                                       | 33369 ± 3277   | 55013 ± 1837*   | 40922 ± 1069#               |
| C16:1                                       | 34617 ± 2253   | 38144 ± 2298    | 37115 ± 1220                |
| C17:0                                       | 429.5 ± 35.39  | 469.9 ± 35.45   | 442.0 ± 19.78               |
| C17:1                                       | 845.6 ± 37.01  | 873.5 ± 16.63   | 767.3 ± 19.01#              |
| C18:0                                       | 11793 ± 840.9  | 21290 ± 657.8*  | 13797 ± 984.3#              |
| C18:1n9c                                    | 17980 ± 1108   | 28358 ± 1335*   | 28373 ± 747.6               |
| C18:1n9t                                    | 22926 ± 1953   | 24671 ± 1517    | 23429 ± 616.6               |
| C18:2n6c                                    | 5308 ± 661.7   | 5006 ± 280.0    | 5429 ± 284.2                |
| C18:2n6t                                    | 480.0 ± 49.83  | 571.0 ± 115.5   | 577.6 ± 65.52               |
| C18:3n6                                     | 2452 ± 162.6   | 2216 ± 11.28    | 2462 ± 72.71#               |
| C18:3n3                                     | 319.4 ± 50.17  | 186.7 ± 10.35   | 330.5 ± 42.42#              |
| C20:0                                       | 34.99 ± 9.240  | 71.35 ± 4.289*  | 75.35 ± 15.60               |
| C20:1n9                                     | 104.9 ± 16.99  | 164.3 ± 7.179*  | 89.98 ± 23.33               |
| C20:2n6                                     | 21.74 ± 5.267  | 49.63 ± 1.268*  | 24.29 ± 5.560#              |
| C20:3n6                                     | 124.6 ± 23.29  | 194.0 ± 24.51   | 126.7 ± 30.63               |
| C20:3n3                                     | 0.775 ± 0.2146 | 2.250 ± 0.7858  | 1.388 ± 0.1573              |
| C20:4n6                                     | 735.2 ± 122.6  | 1108 ± 69.95    | 636.8 ± 156.1               |
| C20:5n3                                     | 546.6 ± 86.09  | 953.4 ± 45.37*  | 541.5 ± 125.0#              |
| C21:0                                       | 2.475 ± 0.725  | 5.850 ± 1.126   | 2.200 ± 0.950               |
| C22:0                                       | 40.01 ± 10.02  | 59.25 ± 7.039   | 39.84 ± 20.82               |
| C22:2                                       | 9.463 ± 3.798  | 13.67 ± 1.349   | 10.11 ± 2.993               |
| C22:6n3                                     | 361.1 ± 59.02  | 563.4 ± 31.29*  | 311.1 ± 75.12#              |
| C23:0                                       | 7.250 ± 1.286  | 11.20 ± 1.935   | 4.680 ± 1.696#              |
| C24:0                                       | 30.80 ± 8.530  | 42.28 ± 4.217   | 32.93 ± 32.03               |
| C24:1n9                                     | 41.86 ± 5.048  | 85.72 ± 9.331*  | 44.92 ± 13.88               |
| C22+23+24                                   | 78.06 ± 19.68  | 112.7 ± 13.11   | 61.78 ± 36.45               |
| Total FA                                    | 146135 ± 10387 | 186338 ± 115.4* | 171210 ± 5788               |
| Saturated FA                                | 56589 ± 4713   | 85793 ± 1609*   | 67884 ± 2461#               |
| Unsaturated FA                              | 89547 ± 6021   | 104830 ± 5350   | 103327 ± 3364               |

Mean ± SEM. \*p < 0.05 compared with control; #p < 0.05 compared with OA:PA.
